# Supplementary material for: Signal enhancement ratio of multi-phase contrast-enhanced MRI: an imaging biomarker for survival in pancreatic adenocarcinoma
Source: Springer Nature journal article supplement (doi:10.1007/s00330-024-10746-z), 2024-05-15
Supplement: MOESM1 [file 27094802]

**Signal enhancement ratio of multi-phase contrast-enhanced MRI: an imaging biomarker for survival in pancreatic adenocarcinoma**

**ELECTRONIC SUPPLEMENTARY MATERIAL**

**Appendix E1. MRI protocol and analysis**

**I) MRI protocol**

The parameters of 16-phase DCE-MRI in training and validation datasets and conventional multi-phase CE-MRI in the internal and two external test datasets are listed in Tables E1 and E2, respectively. In training and validation datasets, T2WI was obtained using a 2D turbo spin echo sequence using acquisition matrix =  $240 \times 320$ , FOV =  $285 \text{ mm} \times 380 \text{ mm}$ , slice thickness = 4 mm, TE = 78 ms, TR = 6765 ms. Diffusion-weighted imaging (DWI) was obtained with acquisition matrix =  $108 \times 136$ , FOV =  $285 \text{ mm} \times 360 \text{ mm}$ , slice thickness = 4 mm, TE = 51 ms, TR = 2200 ms, b-values = 50, and 800  $\text{s/mm}^2$ .

**II) Regions of Interest (ROIs) delineation and analysis**

Two radiologists (C.X. and Z.B.) independently performed ROI delineation by using a software tool “ITK-SNAP”([www.itk-snap.org](http://www.itk-snap.org)), who were blinded to clinical and histopathological data. The three-dimensional ROIs of tumors were drawn on axial images of DCE-MRI in all datasets, and on axial T2WI and DWI in training and validation datasets. The cystic or necrotic areas were carefully excluded. The two-dimensional ROIs ( $100\text{-}150 \text{ mm}^2$ ) of paraspinal muscle were placed on both sides at

the renal hilum level. The tumor-to-muscle SI ratio was calculated as the signal intensity of the tumor to paraspinal muscle on T2WI and all pre- and post-contrast scans on 16-phase DCE-MRI.

## **Appendix E2. Linear regression analysis for tissue quantification**

To evaluate the predictive capacity of SER for tissue quantification, we first integrate the optimal  $SER_{300\_35}$  into a linear or piece-wise linear regression model utilizing the training dataset. Second, to evaluate the generalizability of SER for tissue quantification on conventional multi-phase CE-MRI, we integrate the  $SER_{150\_50}$  into a linear or piece-wise linear regression model, again employing the training dataset.

The performance of the models in the validation dataset is summarized in Table E3. The piece-wise linear regression models show better performance than the linear models, as indicated by Mean Absolute Error (MAE) and Root Mean Squared Error (RMSE). As a result, the definitive model selected is a piece-wise linear regression model, incorporating the  $SER_{300\_35}$  or  $SER_{150\_50}$  value.:

$$\text{Stromal proportion (x=SER}_{300\_35}\text{): } y = \begin{cases} 59.8x - 18.7, & (x < 1.36) \\ 12.4x + 45.6, & (x \geq 1.36) \end{cases}$$

$$\text{Epithelial proportion (x=SER}_{300\_35}\text{): } y = \begin{cases} -29.3x + 68.7, & (x < 1.77) \\ -2.94x + 22.2, & (x \geq 1.77) \end{cases}$$

$$\text{Stromal proportion (x=SER}_{150\_50}\text{): } y = \begin{cases} 68.5x - 18.2, & (x < 1.29) \\ 34.5x + 25.5, & (x \geq 1.29) \end{cases}$$

$$\text{Epithelial proportion (x=SER}_{150\_50}\text{): } y = \begin{cases} -58.6x + 93.3, & (x < 1.31) \\ -0.86x + 17.7, & (x \geq 1.31) \end{cases}$$

**Table E1. Parameters of 16-phase DCE-MRI in training and validation datasets**

| <b>Parameter</b>            |                             |
|-----------------------------|-----------------------------|
| Magnetic field strength     | 3.0 T                       |
| Sequence                    | CAIPIRINHA-Dixon-TWIST-VIBE |
| Manufacturer                | SIEMENS                     |
| TR/TE, ms                   | 4.25/1.28                   |
| Flip angle, degree          | 12                          |
| Matrix size                 | 320 × 210                   |
| Slice thickness (mm)        | 3                           |
| Pixel spacing (mm)          | 1.3 × 1.3                   |
| Field of View (mm)          | 400 × 263                   |
| Parallel imaging            | CAIPIRINHA: 2 × 2-1         |
| Fat suppression             | 2-point Dixon method        |
| TWIST (A/B)                 | 20%/25%                     |
| Dynamic reconstruction mode | Forward share               |
| Temporal resolution, s      | 2.64                        |
| Contrast agent              | Gd-DOPA                     |
| Contrast dose (mmol/kg)     | 0.1                         |
| Injection rate (ml/s)       | 2.5                         |

Note. CAIPIRINHA = controlled aliasing in parallel imaging results in higher acceleration, TWIST = time-resolved imaging with interleaved stochastic trajectories, VIBE = volumetric interpolated breath-hold examination.

**Table E2. parameters of conventional multi-phase CE-MRI in internal and two external test datasets**

| Parameters              | Internal test dataset               | External test dataset 1        | External test dataset 2         |
|-------------------------|-------------------------------------|--------------------------------|---------------------------------|
| Magnetic field strength | 3.0 T                               | 1.5 T                          | 3.0 T                           |
| Sequence                | LAVA                                | VIBE                           | LAVA                            |
| Manufacturer            | GE Medical Systems                  | SIEMENS                        | GE Medical Systems              |
| TR/TE (ms)              | 2.67/1.24                           | 4.49/2.19                      | 4.25/1.67                       |
| Flip angle (degree)     | 12                                  | 10                             | 15                              |
| Matrix size             | 512 × 512                           | 320 × 260                      | 512 × 512                       |
| Slice thickness (mm)    | 4                                   | 3                              | 5                               |
| Pixel spacing (mm)      | 0.7 × 0.7                           | 1.2 × 1.2                      | 0.8 × 0.8                       |
| Field of View (mm)      | 380 × 380                           | 380 × 308                      | 400 × 400                       |
| Contrast agent          | Gd-DOPA                             | Gd-DTPA                        | Gd-DTPA/Gadodiamide             |
| Contrast dose (mmol/kg) | 0.1                                 | 0.1                            | 0.1                             |
| Injection rate (ml/s)   | 2.5                                 | 2.5                            | 2.5                             |
| Acquisition time        | AP: 15-25 s; PVP: 50s; DP: 150-180s | AP: 15-25s; PVP: 55s; DP: 180s | AP: 15s; PVP: 50s; DP: 120-150s |

Note. VIBE = volumetric interpolated breath-hold examination, LAVA = liver acceleration volume acquisition, TR = repetition time, TE = echo time, AP = arterial phase, PVP = portal venous phase, DP = delayed phase.

**Table E3. Model performances for stroma or epithelium proportion regression in the validation dataset.**

| Model(independent variables)                         | Stroma(%) |      | Epithelium(%) |      |
|------------------------------------------------------|-----------|------|---------------|------|
|                                                      | MAE       | RMSE | MAE           | RMSE |
| Piecewise linear regression (SER <sub>300_35</sub> ) | 8.0       | 9.6  | 7.3           | 9.2  |
| Linear regression (SER <sub>300_35</sub> )           | 8.1       | 10.2 | 7.6           | 9.7  |
| Piecewise linear regression (SER <sub>150_50</sub> ) | 9.3       | 12.7 | 8.5           | 11.5 |
| Linear regression (SER <sub>150_50</sub> )           | 9.4       | 12.8 | 8.5           | 11.5 |

Note. MAE = Mean Absolute Error; RMSE = Root Mean Squared Error.

**Table E4. Bias and Agreement of Bland-Altman Analysis between SER and QHA for quantifying stroma and epithelium**

|                             | Stroma (%) |      |               | Epithelium (%) |      |               |
|-----------------------------|------------|------|---------------|----------------|------|---------------|
|                             | Bias       | SD   | LA            | Bias           | SD   | LA            |
| <b>SER<sub>300_35</sub></b> |            |      |               |                |      |               |
| Training dataset            | 0          | 8.9  | -17.4 to 17.4 | -0.3           | 8.3  | -16.6 to 15.9 |
| Validation dataset          | -0.1       | 9.7  | -19.1 to 18.9 | -0.8           | 9.3  | -19.0 to 17.5 |
| <b>SER<sub>150_50</sub></b> |            |      |               |                |      |               |
| Training dataset            | 0          | 11.5 | -22.6 to 22.6 | 0              | 9.4  | -18.4 to 18.4 |
| Validation dataset          | -1.7       | 10.3 | -21.8 to 18.4 | 1.1            | 10.0 | -18.5 to 20.7 |
| Internal test dataset       | -0.9       | 11.1 | -22.6 to 20.9 | 1.9            | 8.5  | -14.7 to 18.4 |
| External test dataset 1     | 1.25       | 12.2 | -22.7 to 25.2 | 3.5            | 11.1 | -18.2 to 25.1 |
| External test dataset 2     | -2.3       | 10.6 | -23.3 to 18.1 | 3.5            | 8.9  | -13.8 to 20.0 |

Note. SD = standard deviation, LA = 95% limits of agreement.

**Table E5. Univariable and multivariable Cox regression analysis of the OS in combined training and validation datasets**

| Parameters                                  | Univariate       |                 | Multivariate     |                 |
|---------------------------------------------|------------------|-----------------|------------------|-----------------|
|                                             | Hazard Ratio     | <i>p</i> -value | Hazard Ratio     | <i>p</i> -value |
| Age (>65 vs. ≤ 65 y )                       | 0.90 (0.58-1.39) | 0.626           |                  |                 |
| Sex (male vs. female)                       | 0.86 (0.56-1.33) | 0.497           |                  |                 |
| CA19-9 level (>37 vs. ≤ 37 U/ml )           | 1.15 (0.70-1.89) | 0.574           |                  |                 |
| Tumor location (head vs. body/tail )        | 1.05 (0.66-1.69) | 0.834           |                  |                 |
| Pathological T stage (T3 vs. T1-2)          | 1.38 (0.87-2.18) | 0.17            | 1.24 (0.76-2.02) | 0.394           |
| Pathological N stage (N1-2 vs. N0)          | 1.79 (1.10-2.91) | 0.019*          | 1.72 (1.04-2.82) | 0.033*          |
| Histological grade (poor vs. well/moderate) | 3.07 (1.80-5.24) | <0.001**        | 2.92 (1.64-5.19) | <0.001**        |
| Resection margin (R1 vs. R0)                | 3.14 (1.12-8.27) | 0.03*           | 1.54 (0.49-4.84) | 0.464           |
| LVI (positive vs. negative)                 | 1.27 (0.75-2.15) | 0.379           |                  |                 |
| Perineural invasion (positive vs. negative) | 0.99 (0.62-1.57) | 0.963           |                  |                 |
| SER <sub>300_35</sub>                       | 0.50 (0.29-0.86) | 0.013*          | ...              | ...             |
| Stro% predicted by SER <sub>300_35</sub>    | 0.97 (0.96-0.99) | 0.003*          | 0.98 (0.96-1.00) | 0.019*          |
| Epi% predicted by SER <sub>300_35</sub>     | 1.04 (1.01-1.06) | 0.004*          | ...              | ...             |
| Adjuvant chemotherapy (yes vs. no)          | 0.75 (0.48-1.17) | 0.211           |                  |                 |

Note. Variables with  $P < 0.10$  in the univariate analysis were included in the multivariate analysis. Data in parentheses are 95% confidence intervals. OS = overall survival, LVI= lymphovascular invasion, SER = Signal Enhancement Ratio, Stro% = the proportion of stroma, Epi% = the proportion of epithelium. \* indicates  $P < 0.05$ , \*\* indicates  $P < 0.001$ .

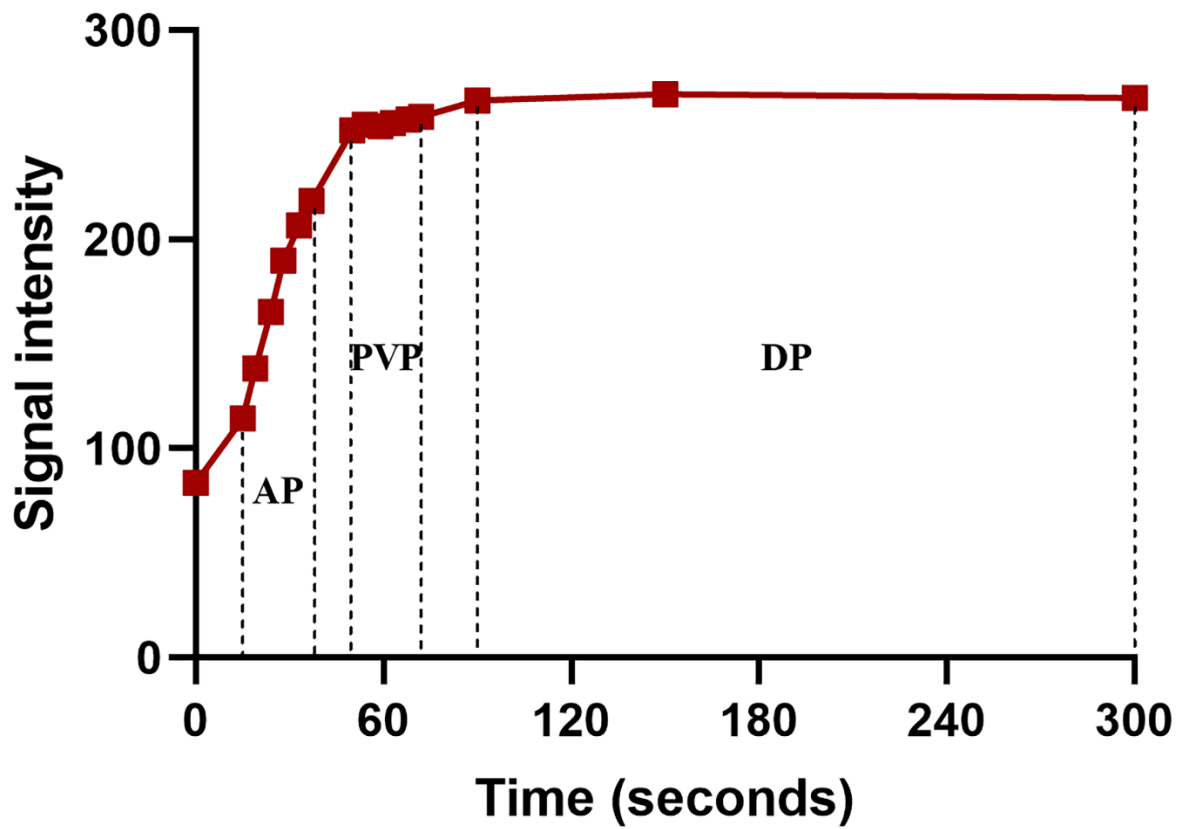

**Fig S1. Time-signal intensity curve of pooled pancreatic adenocarcinoma.**  
AP, arterial phases; PVP, portal venous phases; DP, delayed phases.



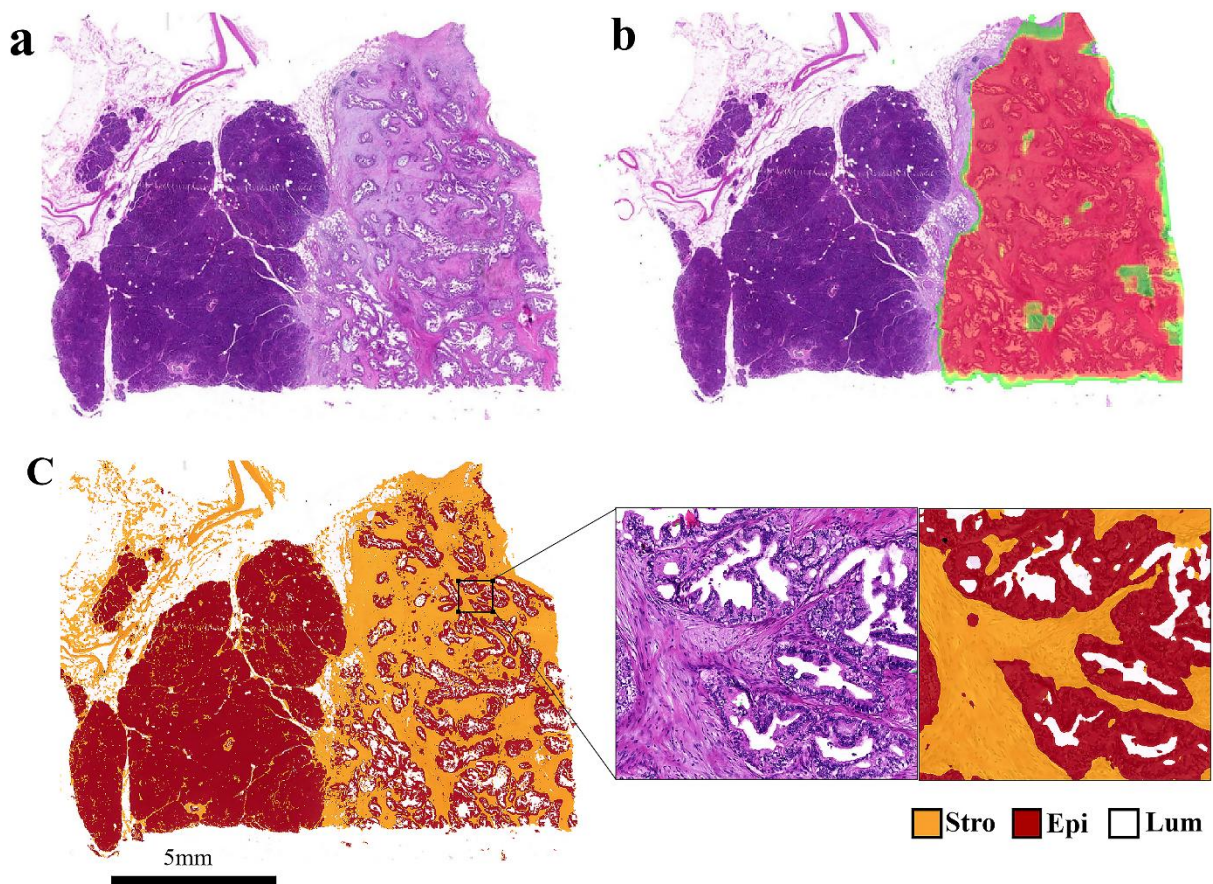

**Fig S2. Deep learning models for automatic tumor detection and tissue segmentation.**

**(a)** whole slide image, **(b)** tumor heatmap, where red represents high tumor likelihood, transparency and green indicate low tumor likelihood, **(c)** segmented tissue map.

Stro = stroma, Epi = epithelium, Lum = lumen.

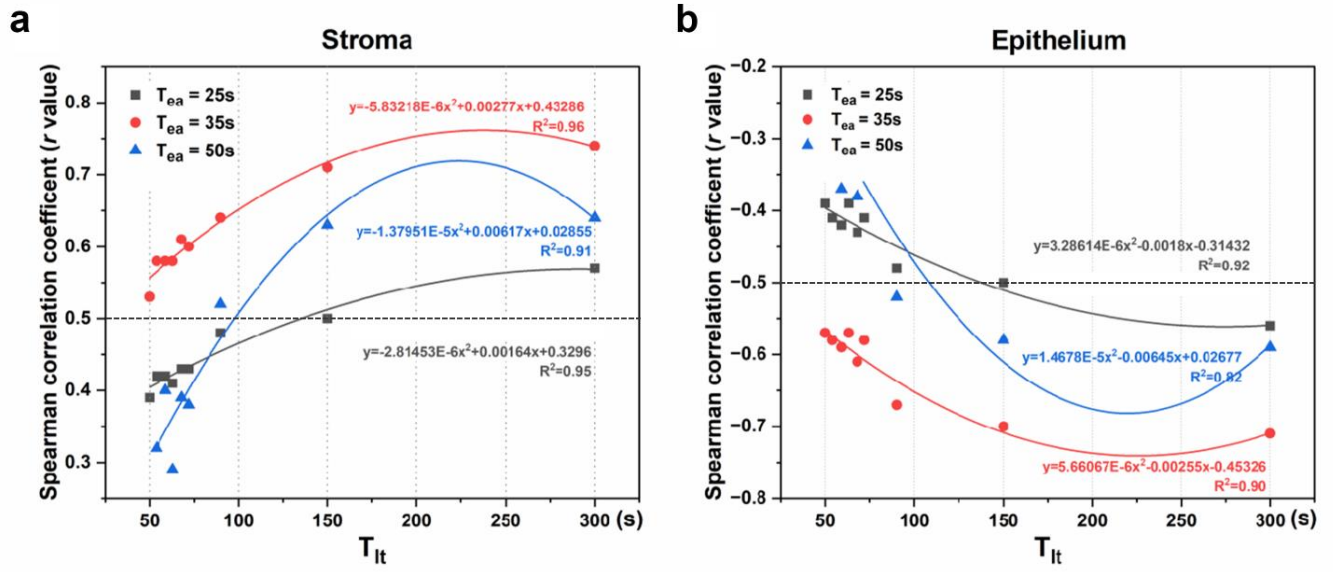

**Fig S3. Time -  $r$  value curve fitting analysis.**

**a, b** showing the Spearman  $r$  value between SER and QHA measured stroma (**a**), and epithelium (**b**) across various  $T_{ea}$  and  $T_{lt}$  time points. Polynomial curve fitting analysis shows the proper  $T_{lt}$  time window is around 150 to 300 seconds after contrast injection (all  $|r| > 0.5$ ).

$T_{ea}$  = the early-contrast time point,  $T_{lt}$  = the late-contrast time point, SER = Signal Enhancement Ratio.
